# Supplementary material
Source: PubMed Central journal article supplement (PMC10518990)

# Supplementary Figure S1

A.

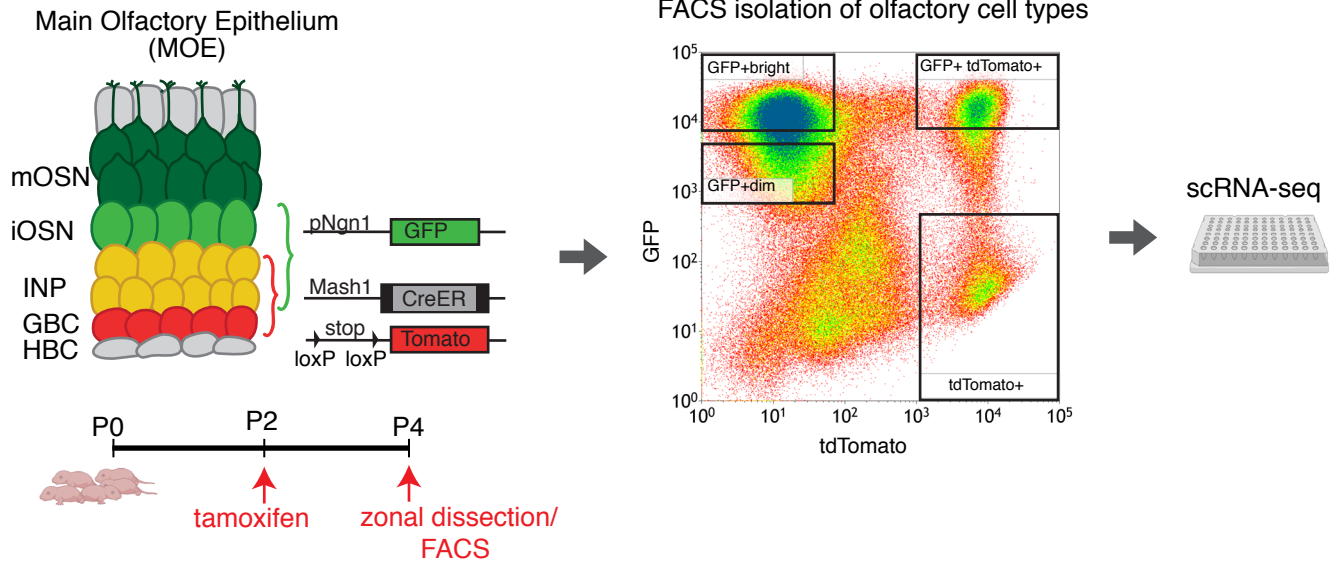

B.

scRNA-seq clustering

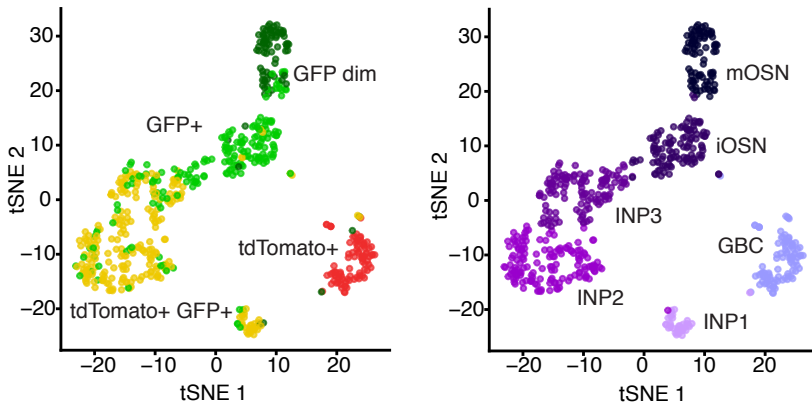

C.

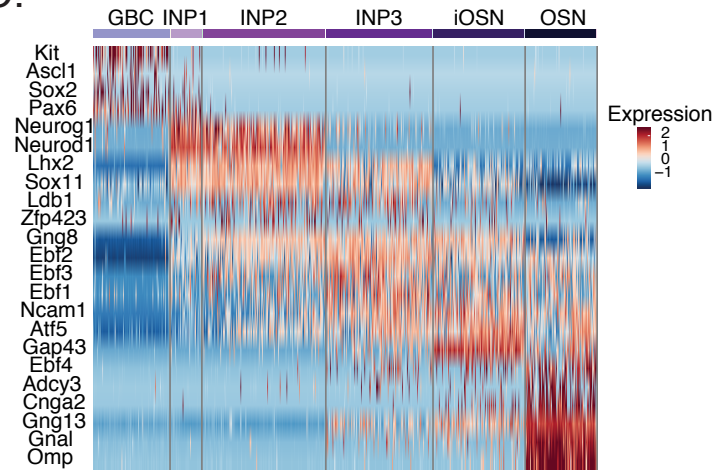

Supplement: media-1.pdf [file media-1.pdf]
