# Supplementary material
Source: PubMed Central journal article supplement (PMC10518990)

# Supplementary Figure S2

A.

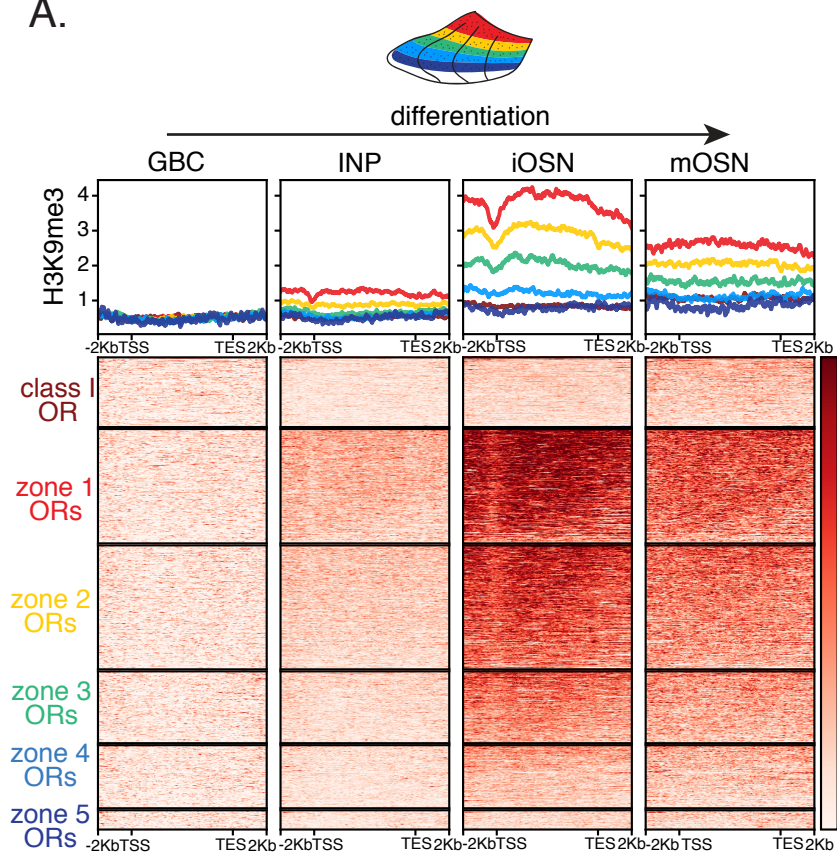

B.

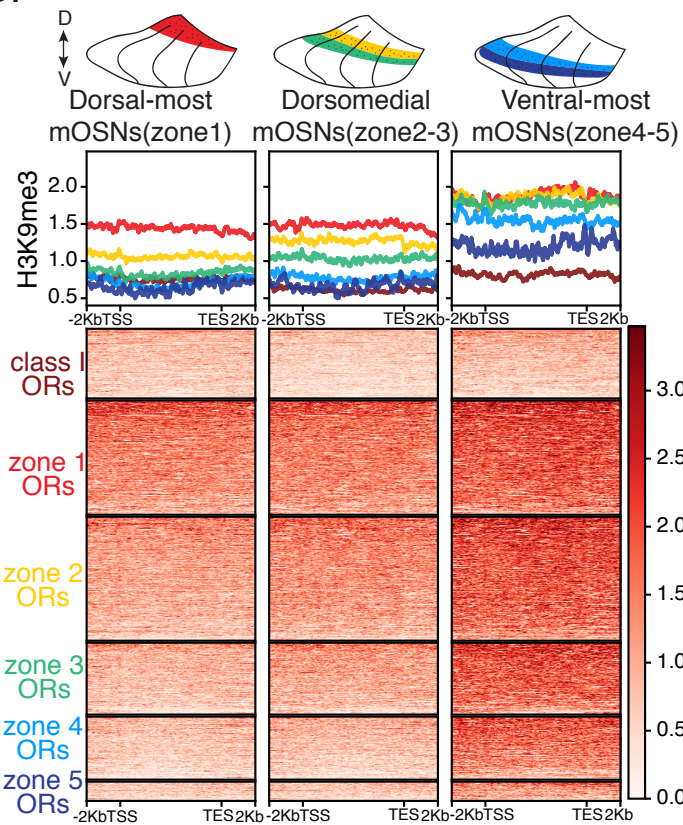

C.

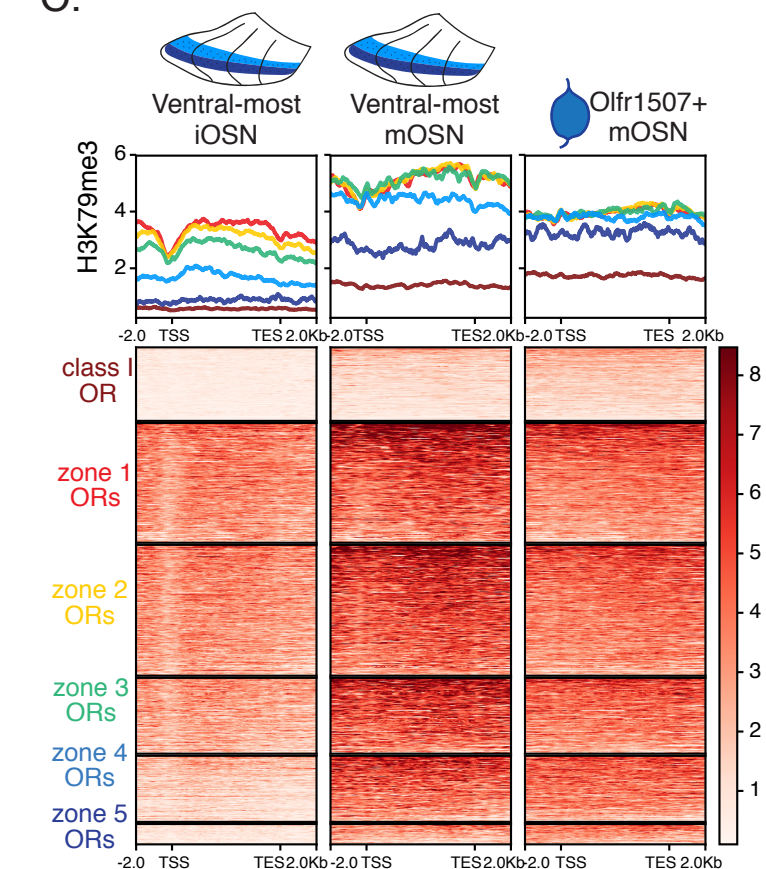

D.

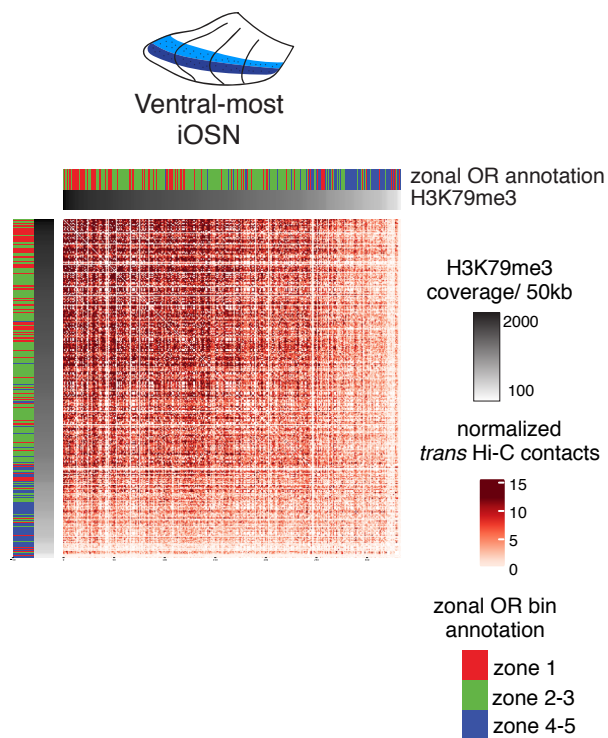

Supplement: media-2.pdf [file media-2.pdf]
