# Supplementary material
Source: PubMed Central journal article supplement (PMC10518990)

# Supplementary Figure 3

 individual dorsal mOSNs (Dip-C)

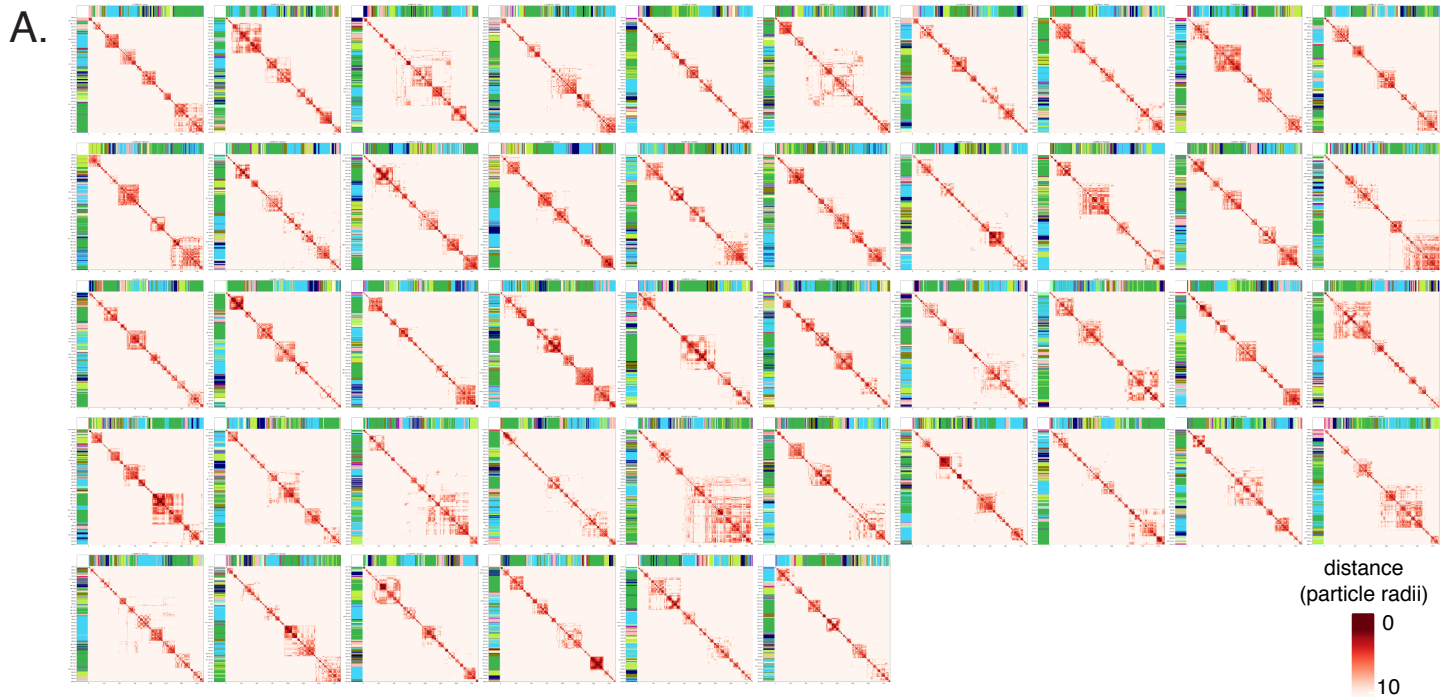

 individual ventral mOSNs (Dip-C)

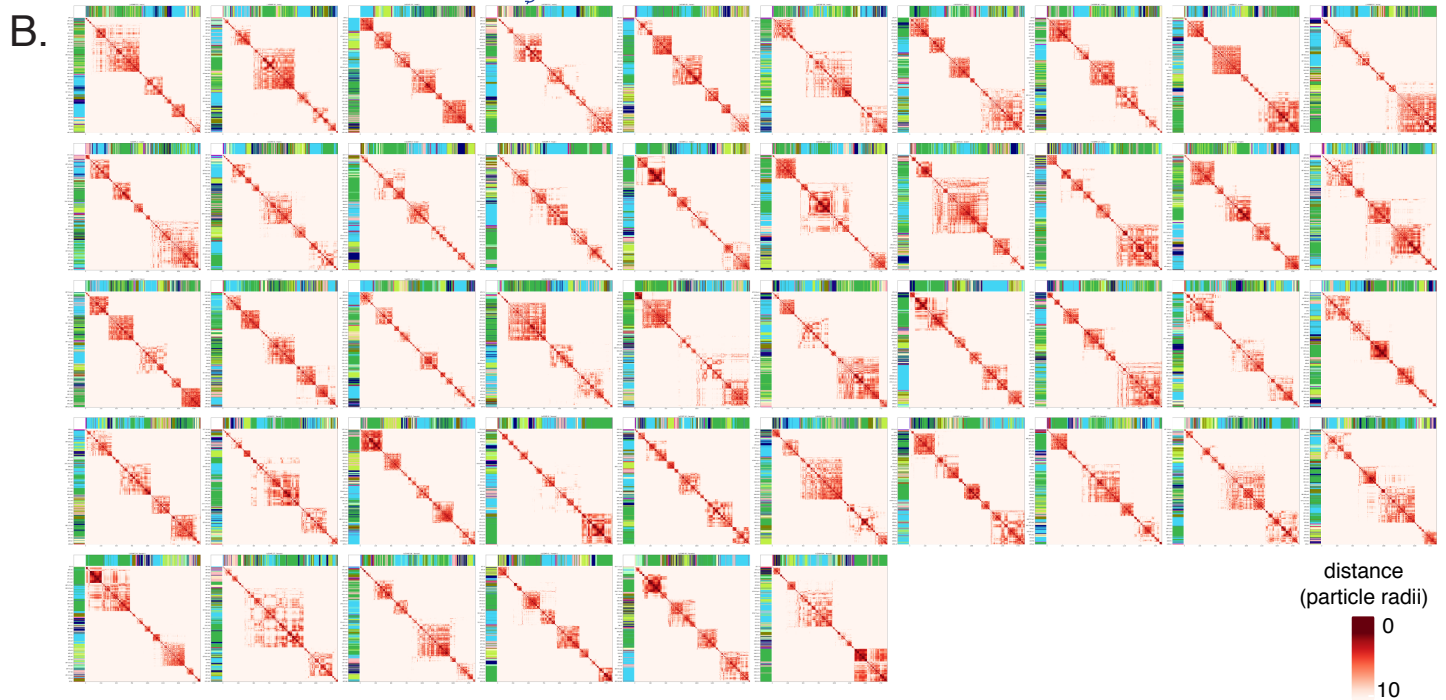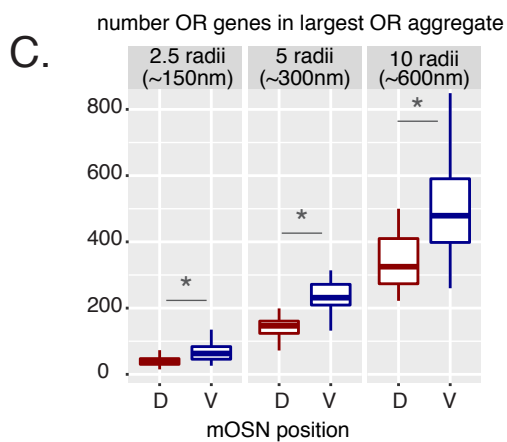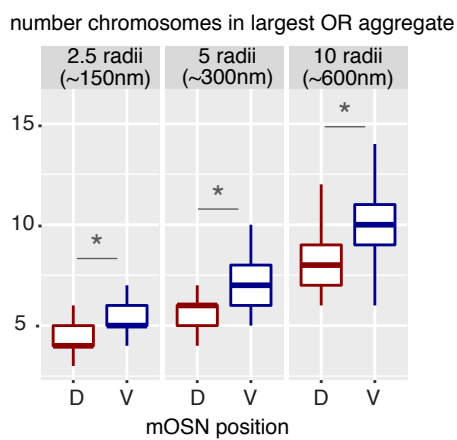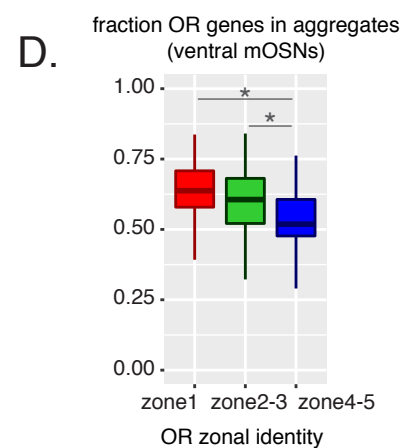

Supplement: media-3.pdf [file media-3.pdf]
