# Supplementary material
Source: PubMed Central journal article supplement (PMC10518990)

# Supplementary Figure S4

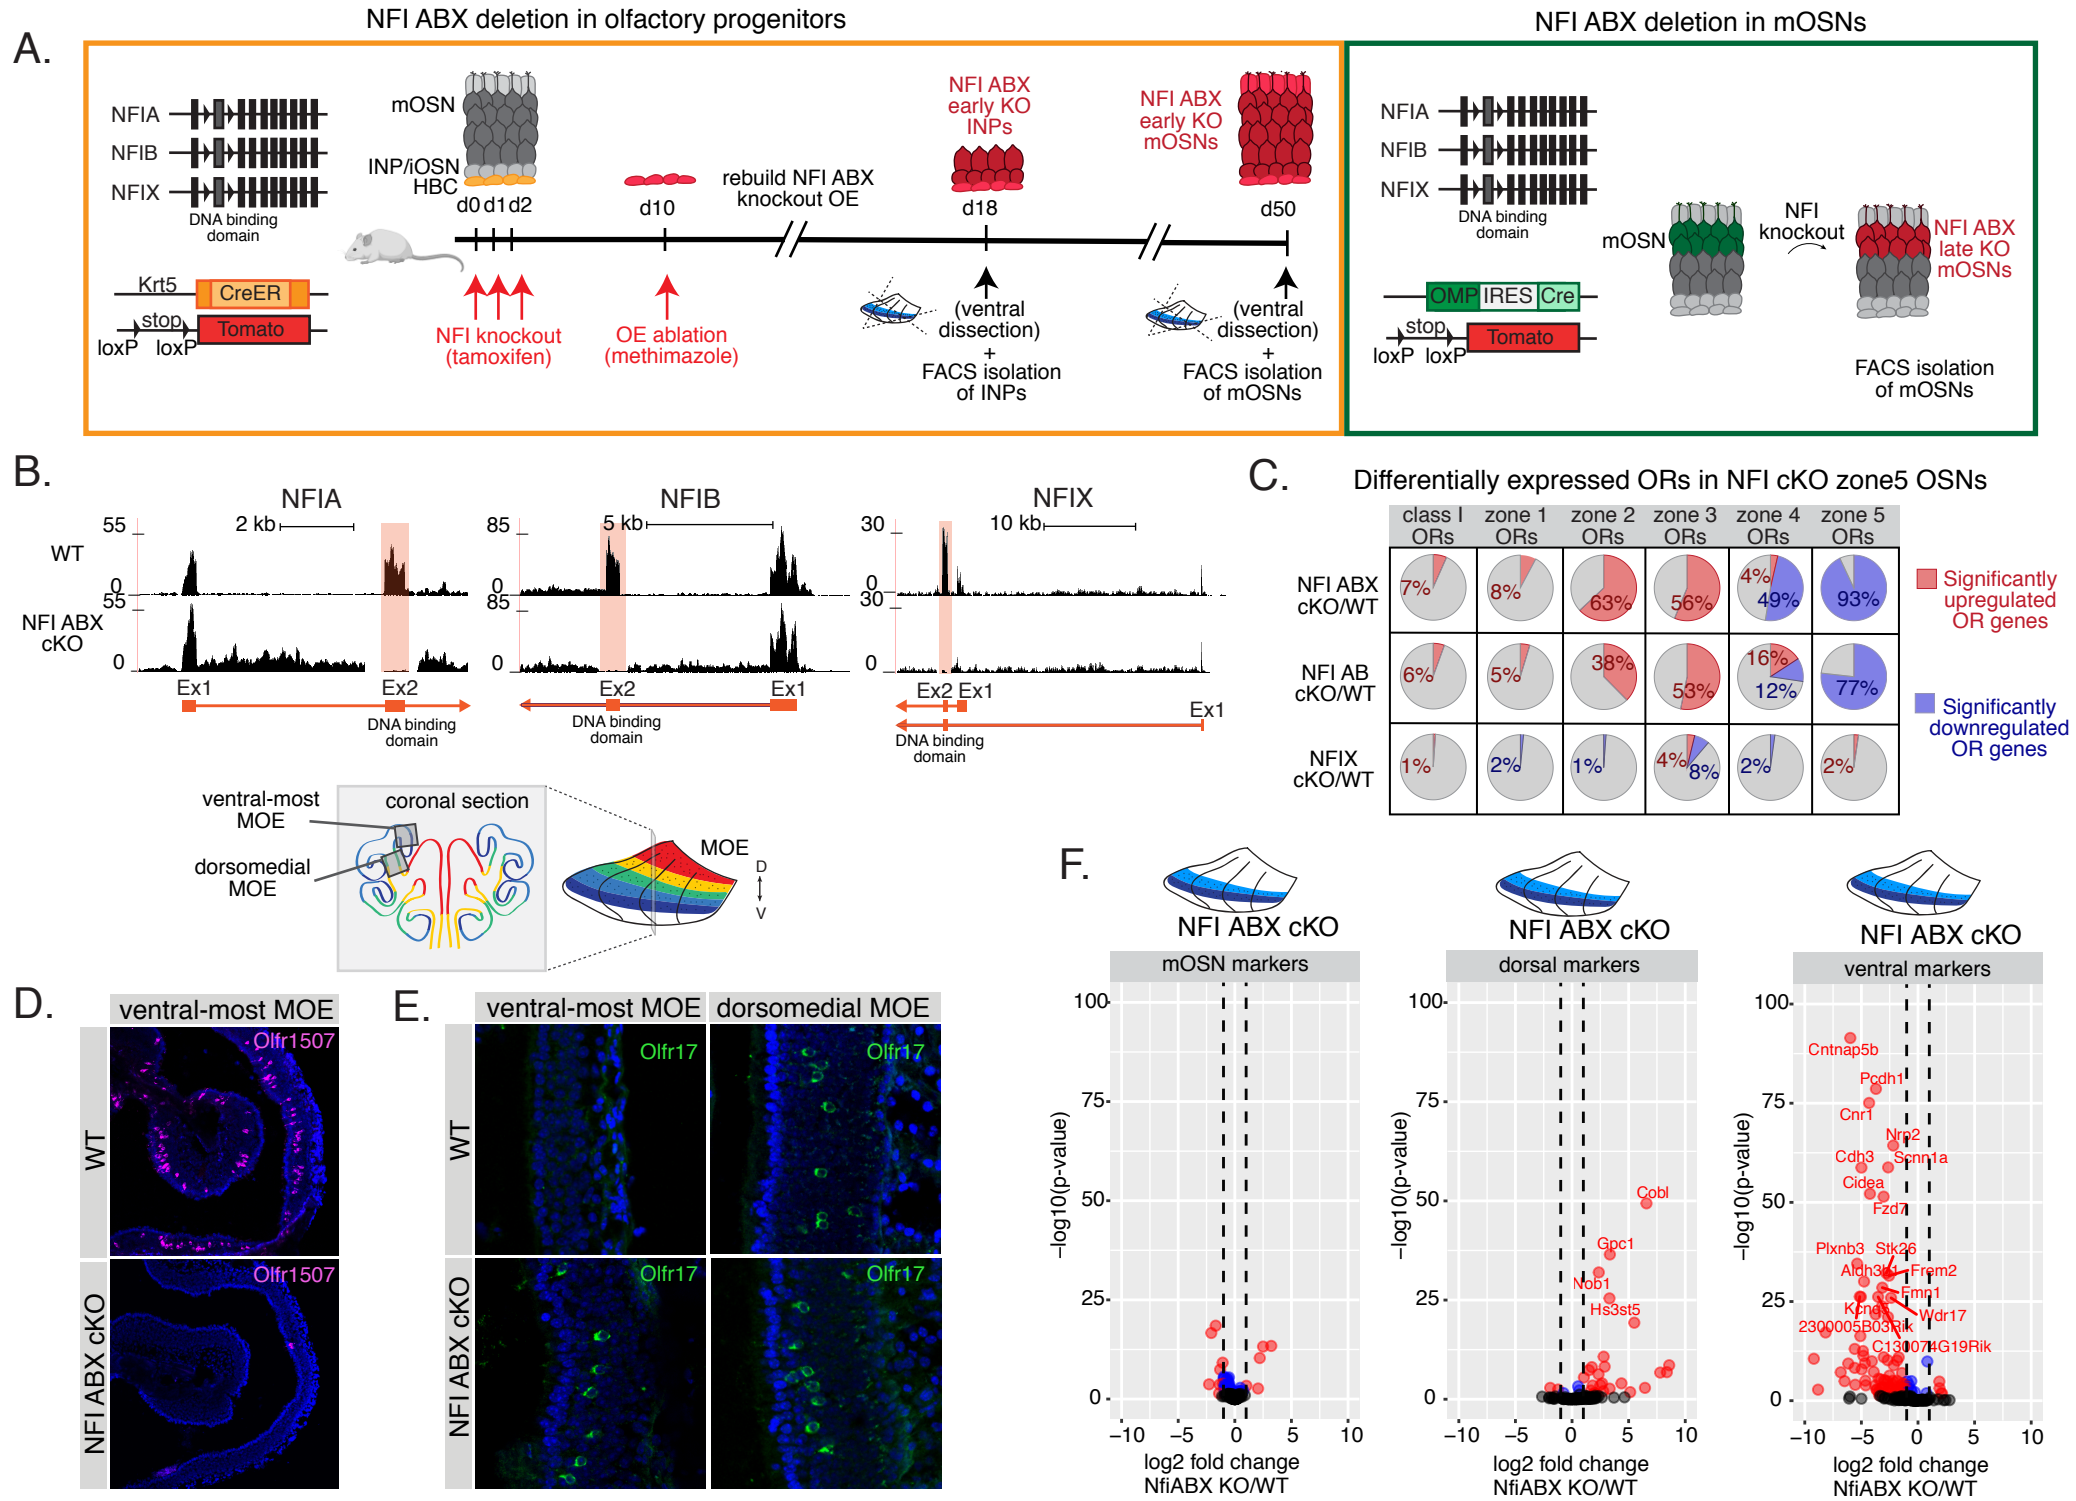

Supplement: media-4.pdf [file media-4.pdf]
