# Supplementary material
Source: PubMed Central journal article supplement (PMC10518990)

Supplementary Figure S5

A.

Olfr309 (zone 2 OR)

Olfr17 (zone 2 OR)

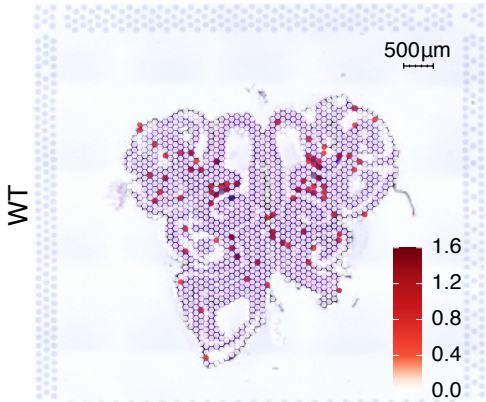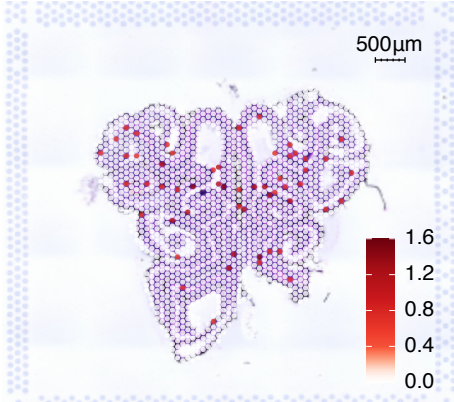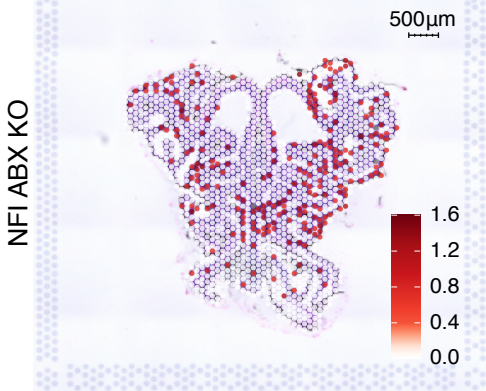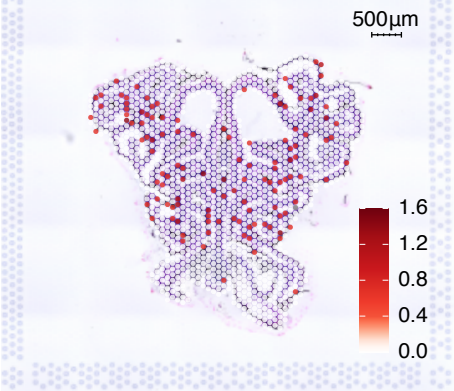

B.

Olfr1507 (zone 5 OR)

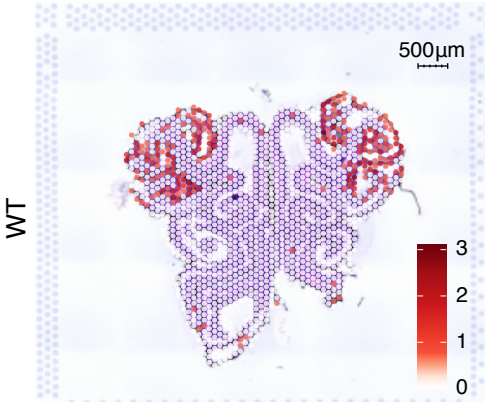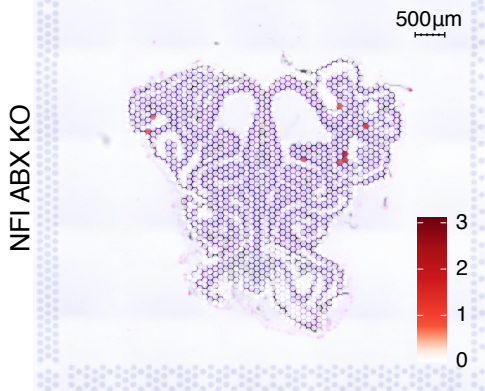

Supplement: media-5.pdf [file media-5.pdf]
