# Supplementary material
Source: PubMed Central journal article supplement (PMC10518990)

# Supplementary Figure S6

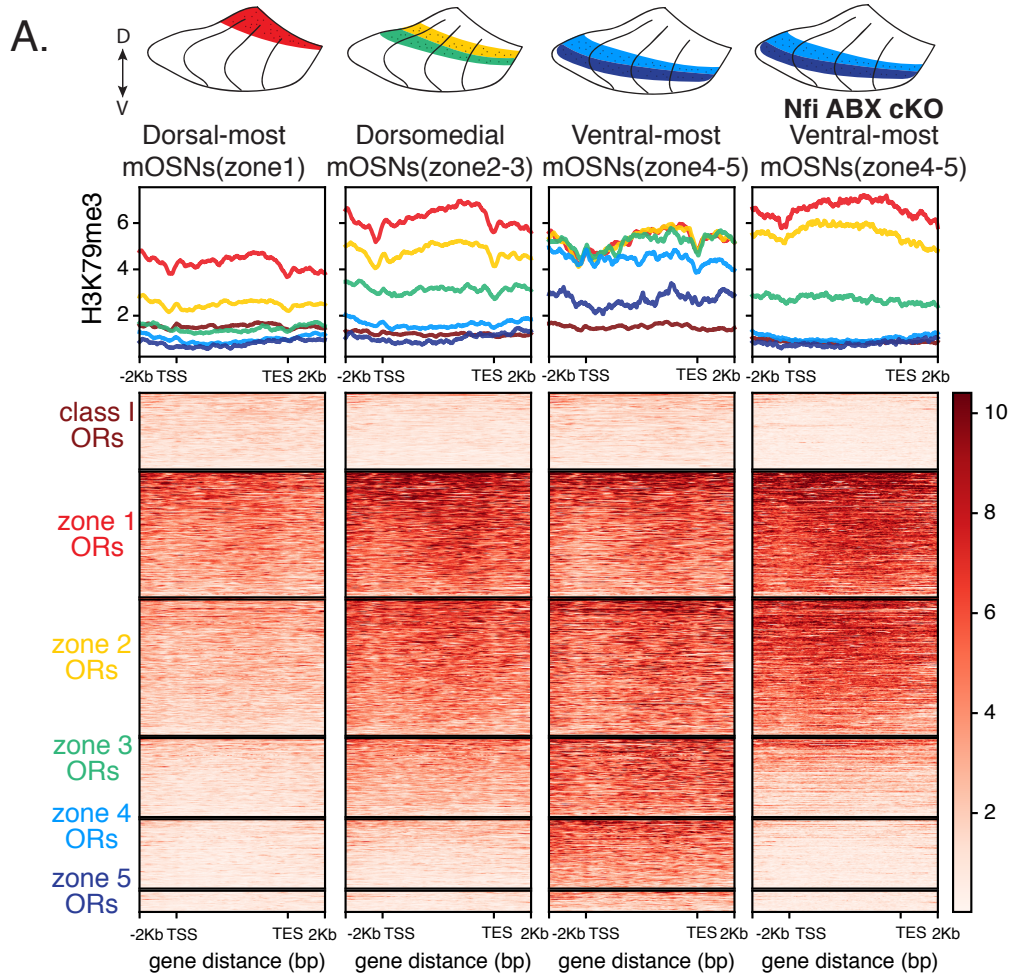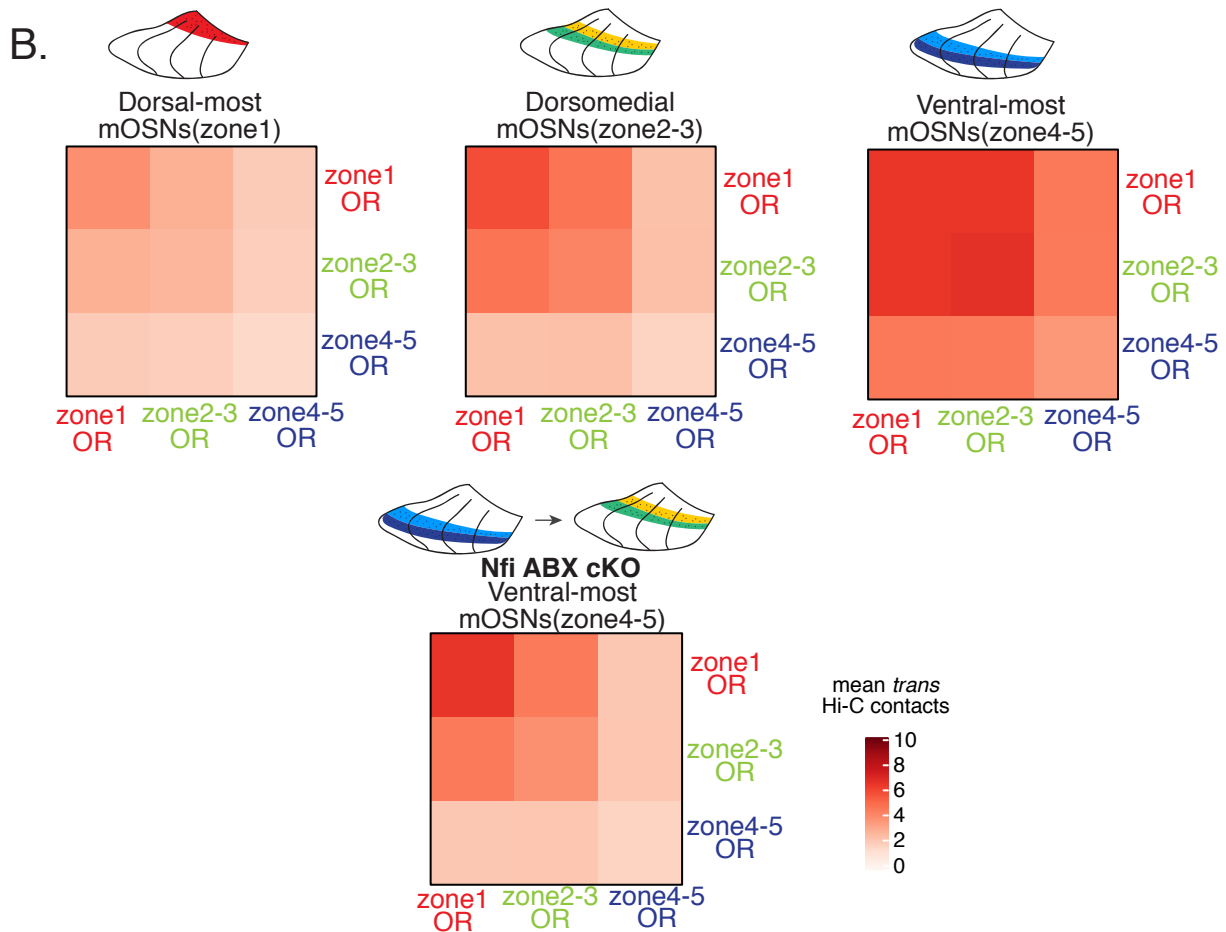

Supplement: media-6.pdf [file media-6.pdf]
