# Supplementary material
Source: PubMed Central journal article supplement (PMC10518990)

# Supplementary Figure S7

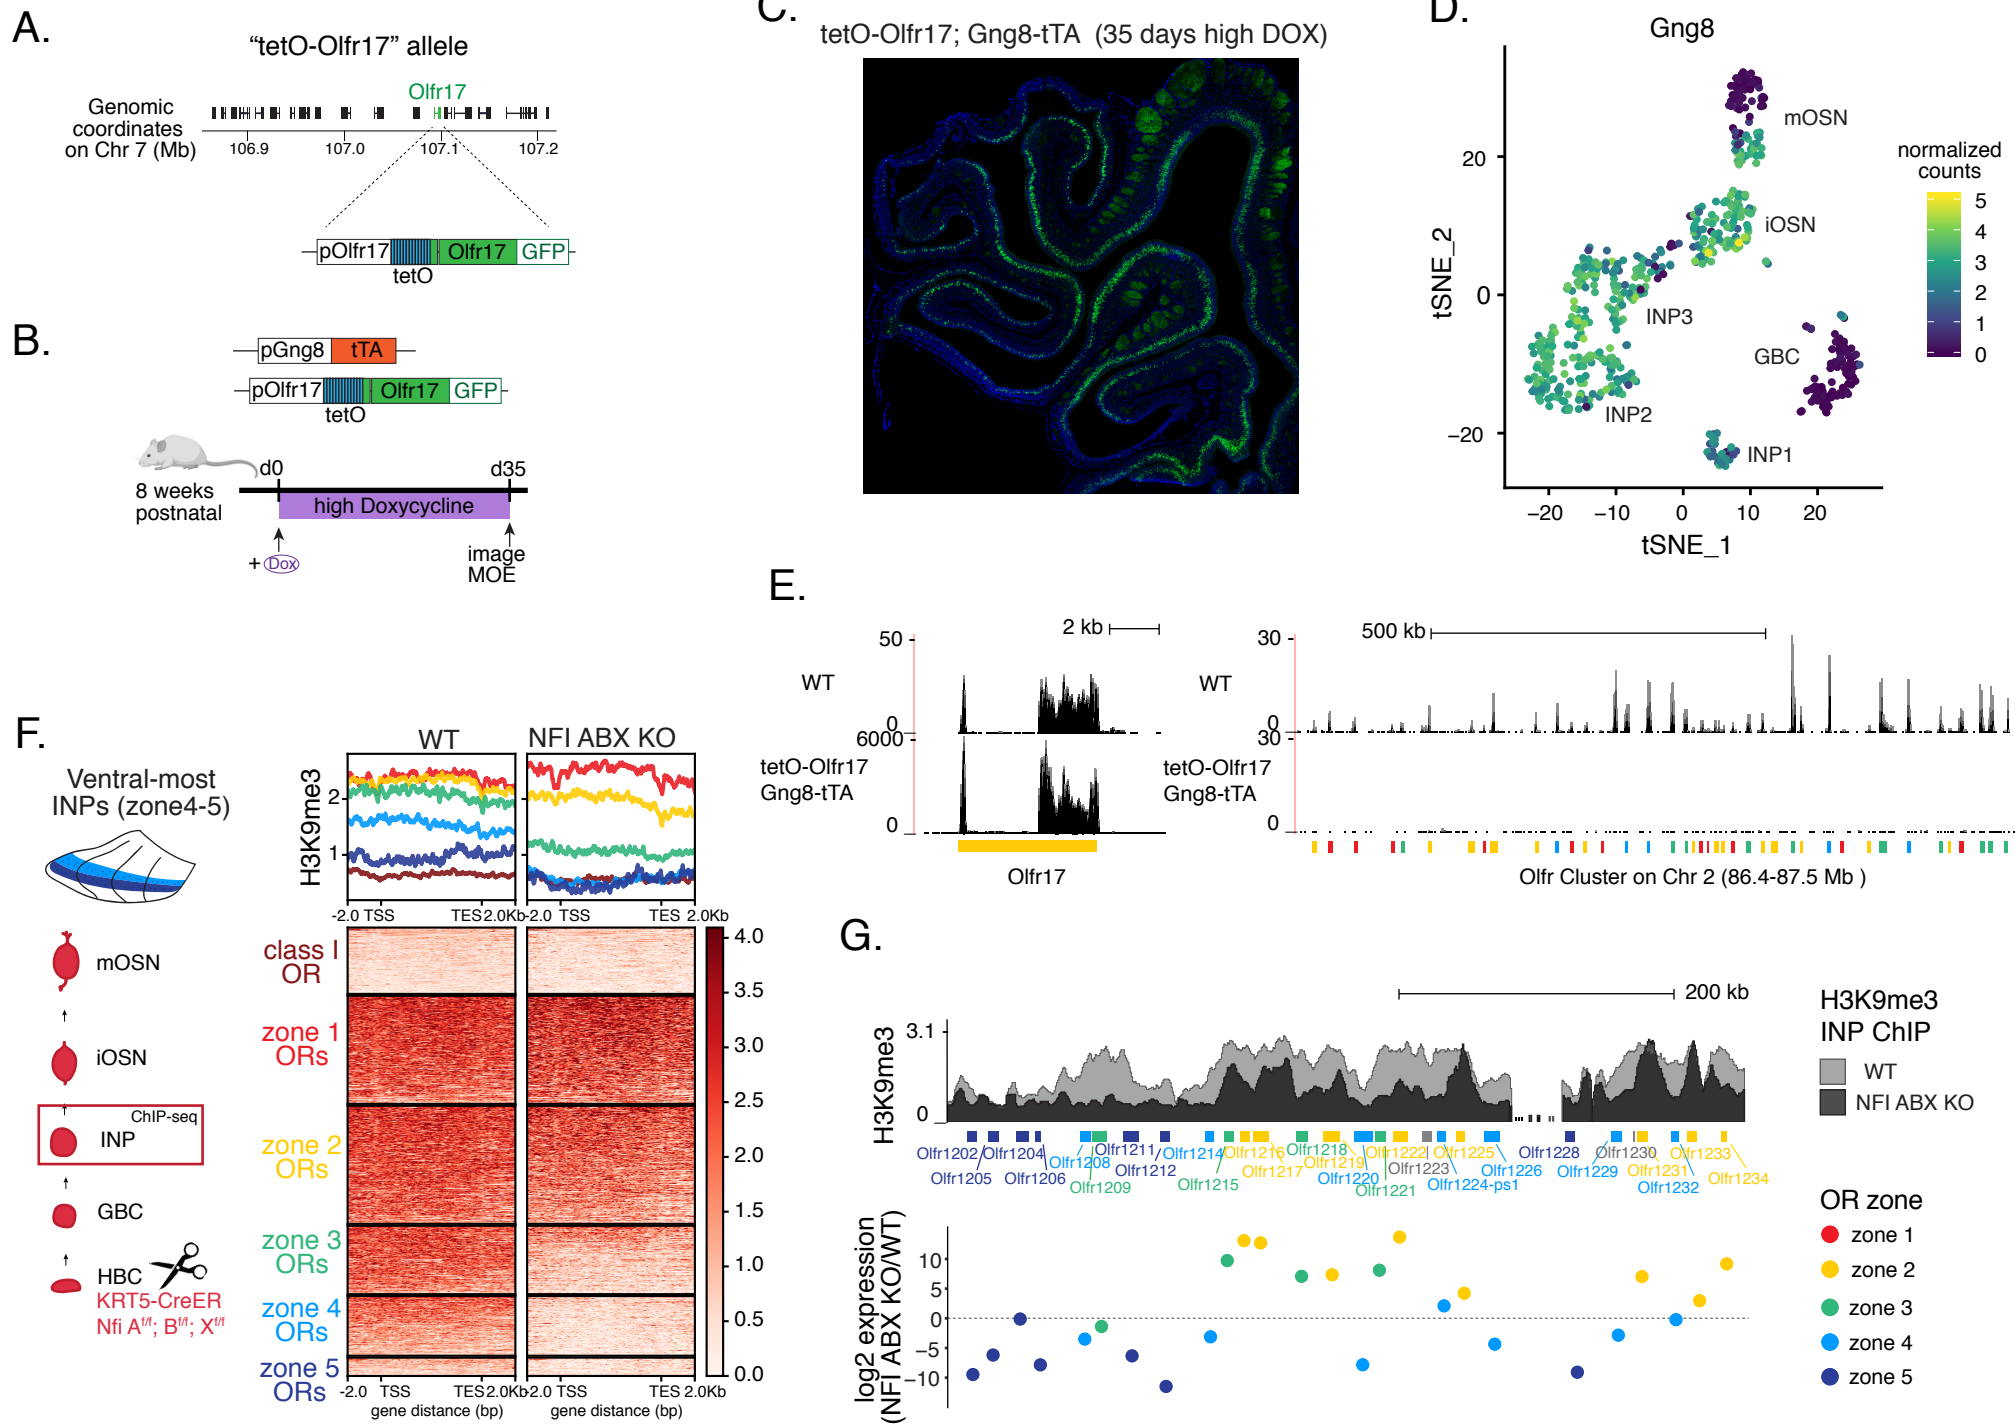

Supplement: media-7.pdf [file media-7.pdf]
